# Supplementary material for: Deep eutectic solvent based ultrasound assisted emulsification microextraction for preconcentration and voltammetric determination of aflatoxin B1 in cereal samples
Source: Royal Society of Chemistry journal article supplement (doi:10.1039/d0ay02197k), 2021-01-01
Supplement: d0ay02197k1.pdf [file d0ay02197k1.pdf]

## Supplementary Material

### **Deep eutectic solvent based ultrasound assisted emulsification microextraction for preconcentration and voltametric determination of aflatoxin B1 in cereal samples**

Zeynab Zohdijamil, Seyed Ahmad Reza Ahmadi Afshar, Sadegh Khezlpour, Mahdi Hashemi \*

Faculty of Chemistry, Bu-Ali Sina University, Hamedan, Iran

---

\* Corresponding author: Tel./Fax: +98-8138380709

E. mail address: [mhashemi@basu.ac.ir](mailto:mhashemi@basu.ac.ir) (M. Hashemi)

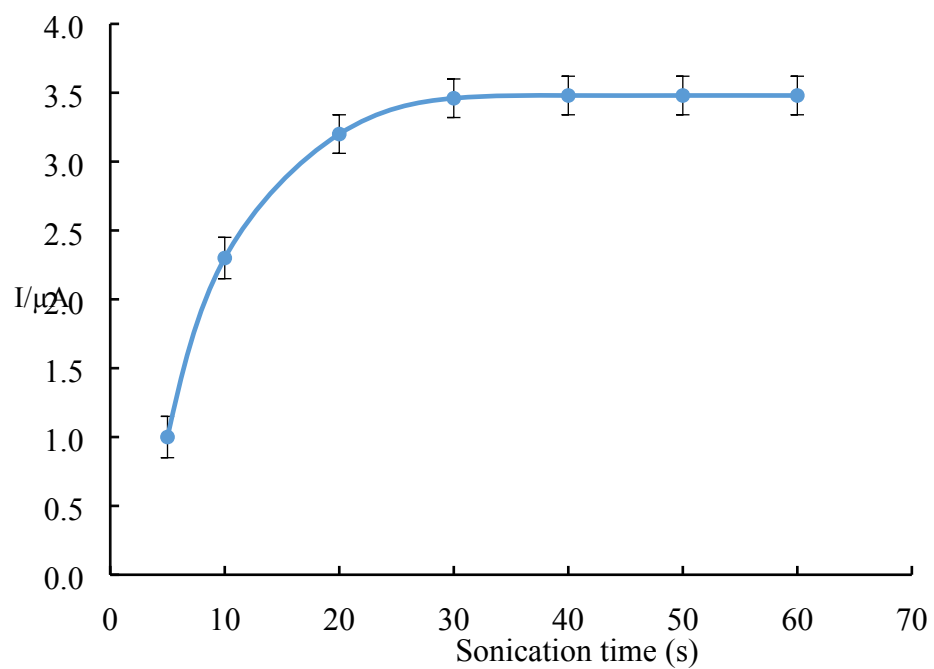

**Fig. S1.** Effect of sonication time. Conditions: AFB1:  $20.0 \mu\text{g L}^{-1}$  AFB1 in ACN: buffer (pH: 7); sample volume: 6 mL; DES volume:  $150\mu\text{L}$ ; equilibrium time: 1 min; centrifuging time: 10 min at 3500 rpm; DPV conditions: scan rate 50 mv/s; step potential: 0.007V; pulse potential: 0.03V; pulse time: 50s.

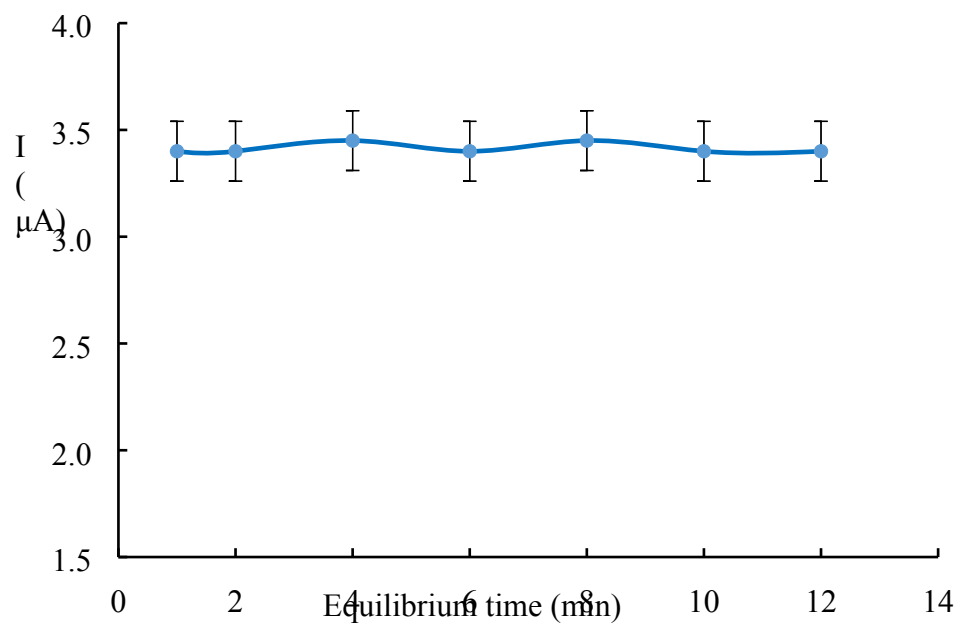

**Fig. S2.** Effect of equilibrium time on peak current. Conditions: AFB1:  $20.0 \mu\text{g L}^{-1}$  in ACN:buffer (pH: 7); sample volume: 6 mL; DES volume:  $150\mu\text{L}$ ; sonication time: 40 s; centrifuging time: 10 min at 3500 rpm; DPV conditions: scan rate 50 mv/s; step potential: 0.007V; pulse potential: 0.03V; pulse time: 50s.

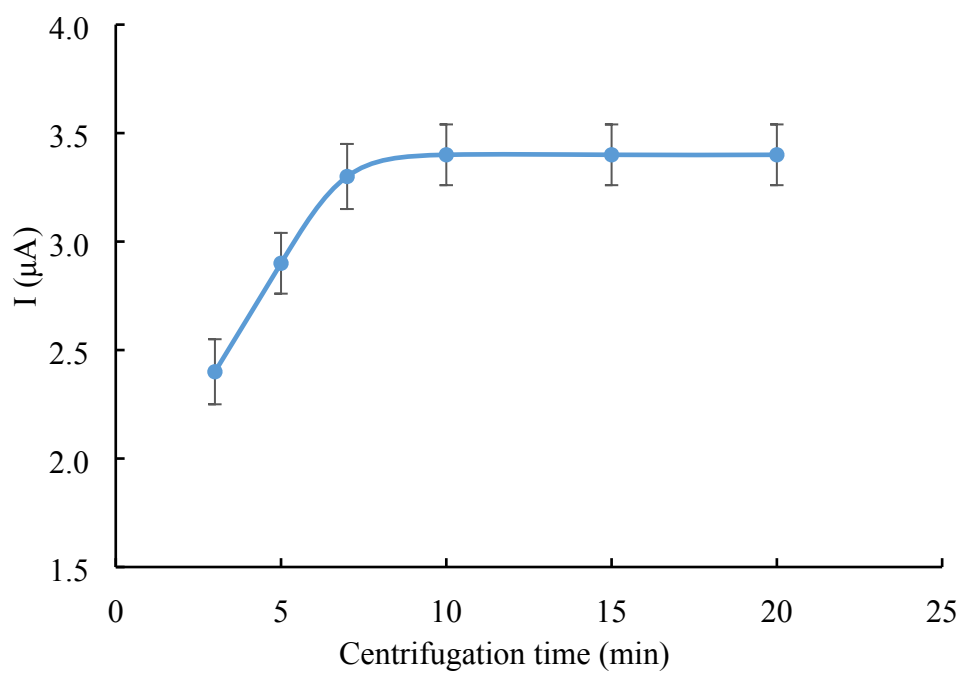

**Fig. S3.** Effect of centrifugation time on peak current. Conditions: AFB1:  $20.0 \mu\text{g L}^{-1}$  in ACN: buffer (pH: 7); sample volume: 6 mL; DES volume:  $150\mu\text{L}$ ; sonication time: 40 s, equilibrium time: 1 min; DPV conditions: scan rate 50 mV/s; step potential: 0.007V; pulse potential: 0.03V; pulse time: 50s.

**Table S1 Physical properties of Ch-Cl DES**

| <b>parameter</b>                    | <b>Data</b>                  | <b>Reference</b> |
|-------------------------------------|------------------------------|------------------|
| HBA-HBD: ratio                      | ChCl-Urea: 1:2               |                  |
| Molar masses                        | 0.25974 kg mol <sup>-1</sup> | S1               |
| Density                             | 24gcm <sup>-3</sup> (45 °C)  | S1               |
| Freezing points, T <sub>f</sub> /°C | 12 °C                        | S1               |
| Surface tension                     | 52.02±0.05 mN/m (25.0 °C )   | S1               |
| Refractive index                    | 1.504                        | S1               |
| Potential window                    | 0.8—1.6 V                    | This work        |

S1: A. P. Abbott, G. Capper, D. L. Davies, R. K. Rasheed and V. Tambyrajah, Novel solvent properties of choline chloride/urea mixtures, CHEM. COMMUN. , 2003, 70–71.  
<http://www.rsc.org/suppdata/cc/b210714g/>

**Table S2** Analytical features of the proposed method

| <b>parameters</b>                                 | <b>Data</b>                   |
|---------------------------------------------------|-------------------------------|
| Regression equation                               | $I_{pc}^a = 0.111C^b + 1.114$ |
| R <sup>2</sup> (Correlation coefficient)          | 0.9970                        |
| Linear rang( $\mu\text{g L}^{-1}$ )               | 0.2-80                        |
| Limit of detection( $\mu\text{g L}^{-1}$ , 3Sb)   | 0.05                          |
| Intra-day RSD (5.0 $\mu\text{g L}^{-1}$ , n = 5)  | 3.3%                          |
| Inter-day RSD (5.0 $\mu\text{g L}^{-1}$ , n = 15) | 4.1%                          |
| Enrichment factor                                 | 52                            |
